# Supplementary material for: Synergistic therapy of chemotherapeutic drugs and MTH1 inhibitors using a pH-sensitive polymeric delivery system for oral squamous cell carcinoma
Source: Royal Society of Chemistry journal article supplement (doi:10.1039/c7bm00395a), 2017-01-01
Supplement: c7bm00395a1.pdf [file c7bm00395a1.pdf]

## Supporting information

# Synergistic Therapy of Chemotherapeutic Drug and MTH1 Inhibitor with pH-Sensitive Polymeric Delivery System for Oral Squamous Cell Carcinoma

Xiao Li,<sup>†,+</sup> Lei Li,<sup>†,+</sup> Yu Huang,<sup>‡</sup> Bing Liu,<sup>†, §</sup> Huirong Chi,<sup>†</sup> Leilei Shi,<sup>‡</sup> Wei Zhang,<sup>§</sup>

Guolin Li,<sup>†,\*</sup> Yumei Niu<sup>†,\*</sup> and Xinyuan Zhu<sup>‡,\*</sup>

<sup>†</sup> *Department of Oral and Maxillofacial Surgery, The First Affiliated Hospital of Harbin Medical University, 23 Youzheng Street, Nangang District, Harbin 150001, People's Republic of China*

<sup>‡</sup> *School of Chemistry and Chemical Engineering, State Key Laboratory of Metal Matrix Composites, Shanghai Jiao Tong University, 800 Dongchuan Road, Shanghai 200240, People's Republic of China*

<sup>§</sup> *Translational Medicine Research and Cooperation Center of Northern China, Heilongjiang Academy of Medical Sciences, 157 Baojian Street, Nangang District, Harbin 150081, People's Republic of China*

\* Corresponding author. E-mail: liguolin@126.com (G.L.); yumeiniu@163.com (Y.M.); xyzhu@sjtu.edu.cn (X.Z.). Telephone: +86-21-34203400; Fax: +86-21-54741297.

## Notes

<sup>+</sup> These authors are joint first authors.

## Experimental

The cationic hyperbranched poly(amine-ester)s were prepared by proton-transfer polymerization. A typical polymerization procedure is as follows: A suspension of KH in mineral oil (30% in weight) was introduced in a dry preweighted 100 mL Schlenk flask under argon (Ar). The mineral oil was removed by three extractions with THF, and the remaining THF was removed by vacuum. When KH was completely dried, the flask was weighted again to determine the amount of KH (0.698 g, 17.4 mmol). Then, 40 mL of DMSO and TEOA (12.9 g, 86.5 mmol) was introduced to the flask. The solution was stirred for 30 min to form the potassium alcoholate. Subsequently, GMA (11.8 g, 83.0 mmol) was added by syringe, and the polymerization was conducted at 80 °C for 48 h. Upon completion of the polymerization, the mixture was precipitated in 1000 mL of acetone/diethyl ether (v/v 1/4). The product was redissolved in methanol and neutralized by filtration over cation exchange resin. The obtained polymer was precipitated twice from methanol solution in cold diethyl ether and then dried in vacuo at 25 °C for 24 h.

**Scheme S1. Various Structural Units of Hyperbranched Poly(amine-ester)s**

**Terminal units**

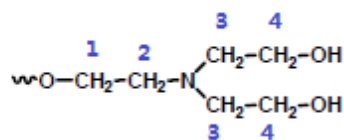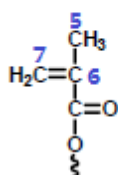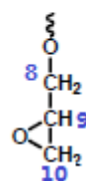

**Linear units**

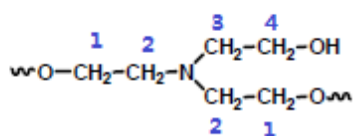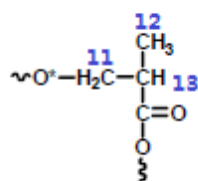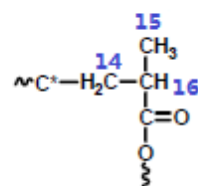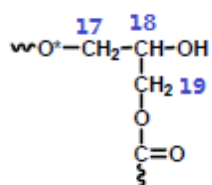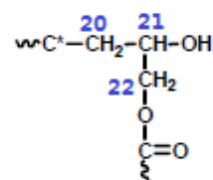

**Dendritic units**

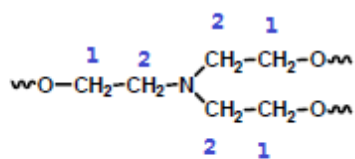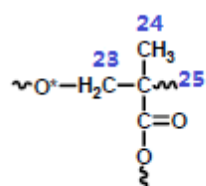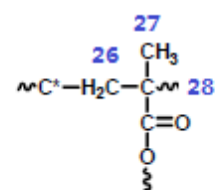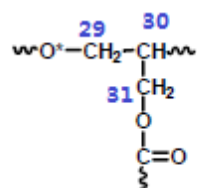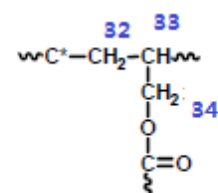

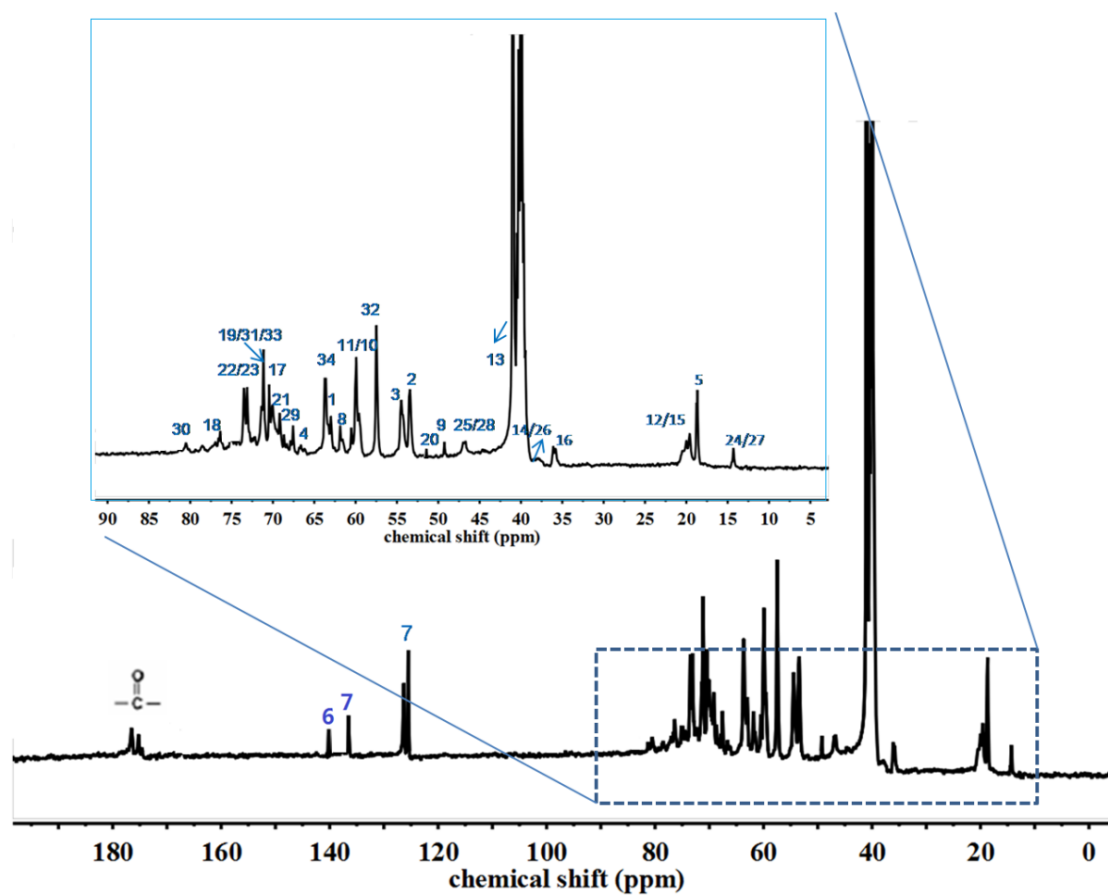

**Figure S1.**  $^{13}\text{C}$  NMR spectrum of hyperbranched poly(amine-ester) synthesized from TEOA and GMA in  $\text{DMSO}-d_6$ . (Inset: regions from 90 to 5 ppm).

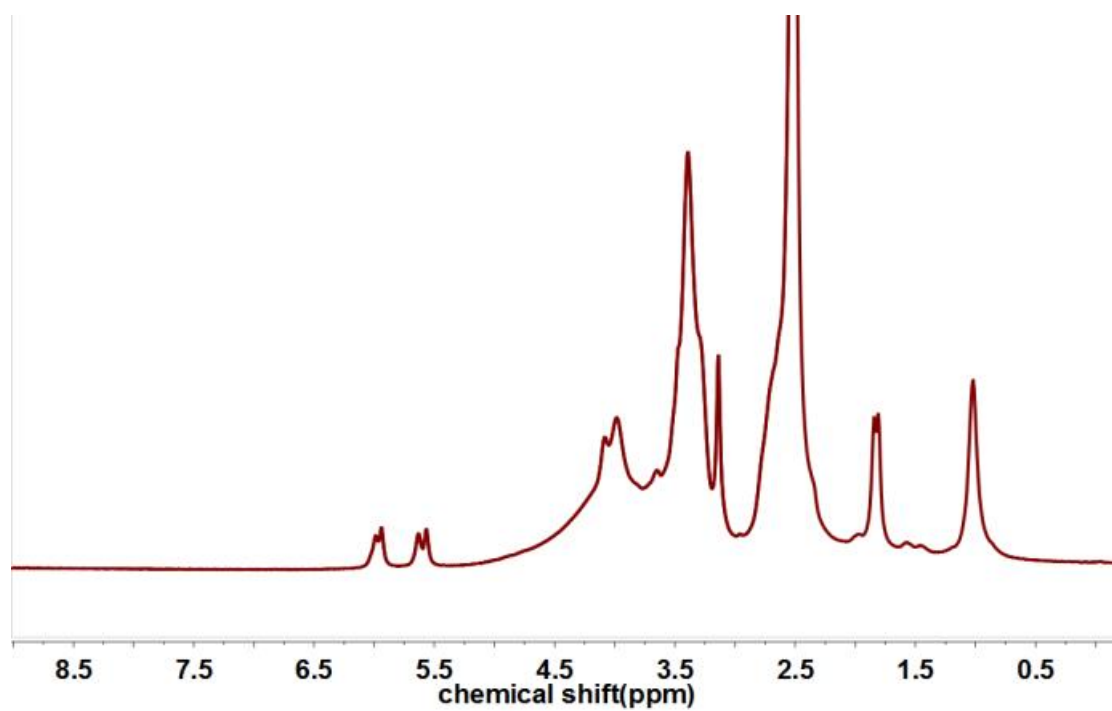

**Figure S2.**  $^1\text{H}$  NMR spectrum of hyperbranched poly(amine-ester) synthesized from TEOA and GMA in  $\text{DMSO}-d_6$ .

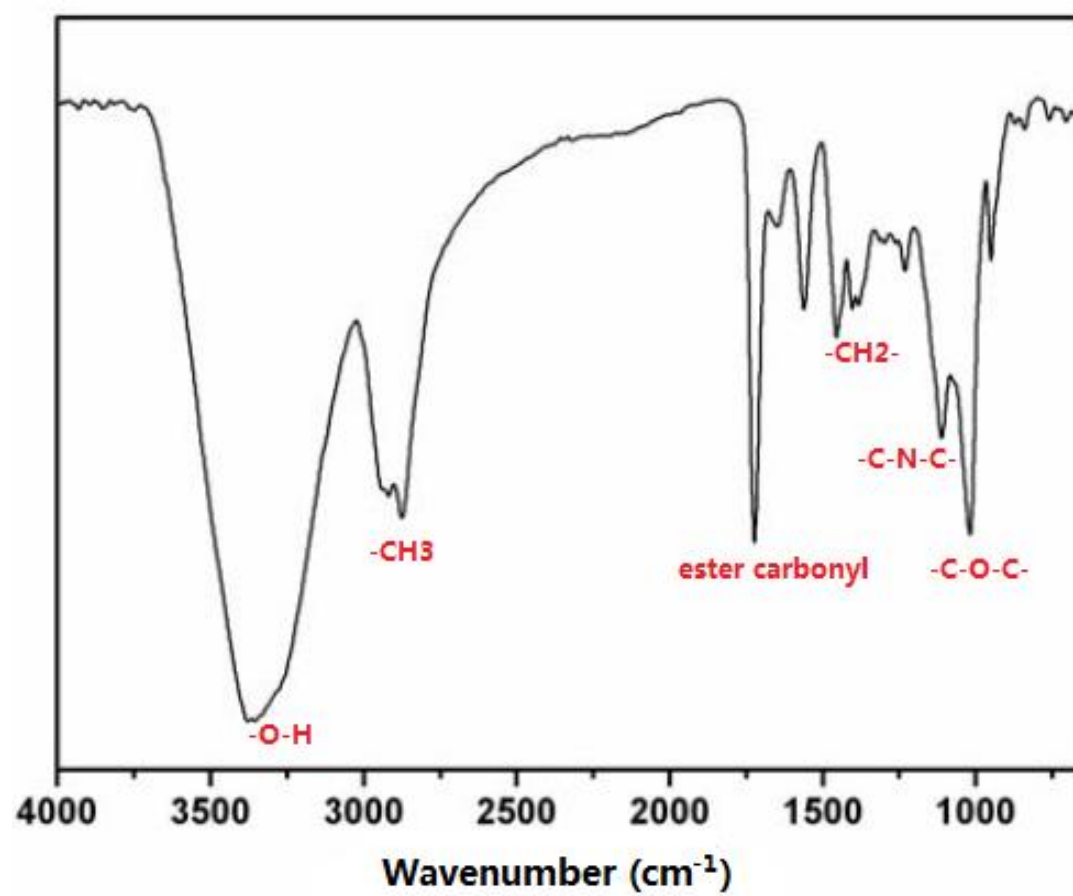

**Figure S3.** Representative FTIR spectrum of hyperbranched poly(amine-ester).
